# Supplementary material
Source: PubMed Central journal article supplement (PMC2701224)
Supplement: NIHMS112810-supplement-supplement_1.pdf [file NIHMS112810-supplement-supplement_1.pdf]

**Table S1 a: Antibodies used for immunohistochemistry and immunofluorescence.**

| <b>Antigen</b>      | <b>Manufacturer</b> | <b>Clone<sup>a</sup></b> | <b>Iso</b>               | <b>Dil</b> | <b>Amplification/<br/>detection<sup>b</sup></b> |
|---------------------|---------------------|--------------------------|--------------------------|------------|-------------------------------------------------|
| CD11c               | BD Pharmingen       | B-ly6                    | IgG1                     | 1:100      | Goat anti-mouse IgG1-A568/A-488                 |
| BDCA-1              | Miltenyi Biotec     | AD5-8E7                  | IgG2a                    | 1:100      | Goat anti-mouse IgG2a-A488/A-568                |
| BDCA-3-PE           | Miltenyi Biotec     | AD5-14H12                | IgG1                     | 1:20       | Goat anti-mouse IgG1-A568                       |
| INOS-FITC           | BD Biosciences      | 6                        | IgG2a                    | 1:50       | Goat anti-FITC-A488                             |
| INOS                | Santa Cruz          | N-20                     | Affinity purified rabbit | 1: 20      | Chicken anti-rabbit A-594                       |
| TNF- $\alpha$ -FITC | BD Biosciences      | 6401.1111                | IgG1                     | 1:10       | Goat anti-FITC-A488                             |
| CD14-A488           | BD Pharmingen       | M5E2                     | IgG2a                    | 1:100      | Goat anti-mouse IgG2a-A488                      |
| CD14-FITC           | BD Biosciences      | M phi P9                 | IgG2b                    | 1:20       | Goat anti-FITC-A488                             |
| DC-SIGN/CD209       | BD Pharmingen       | DCN46                    | IgG2b                    | 1:50       | Goat anti-mouse IgG2b-A488                      |
| DC-LAMP/CD208-PE    | Immunotech          | 104.G4                   | IgG1                     | 1:50       | Goat anti-mouse IgG1-A568                       |
| CD163-FITC          | Acris               | 5C6-FAT                  | IgG1                     | 1:100      | Goat anti-FITC-A488                             |

<sup>a</sup>All antibodies are murine monoclonals unless stated

<sup>b</sup>All amplification/ detection antibodies are from Invitrogen /Molecular Probes unless stated

**Table S1 b: Antibodies used for flow cytometry**

| <b>Antigen-fluorophor</b>            | <b>Manufacturer</b> | <b>Clone<sup>a</sup></b> | <b>Iso</b>   | <b>Dil</b> |
|--------------------------------------|---------------------|--------------------------|--------------|------------|
| BDCA-1 (CD1c)- PE or FITC            | Miltenyi            | AD5-8E7                  | IgG2a        | 1:50       |
| BDCA-3 – PE or FITC                  | Miltenyi            | AD5-14H12                | IgG1         | 1:50       |
| CD163-FITC                           | Acris               | 5C6-FAT                  | IgG1         | 1:20       |
| HLA-DR-APC-Cy7                       | BD Pharmingen       | L243                     | IgG2a        | 1:50       |
| HLA-DR-Alexa 700                     | BioLegend           | L243                     | IgG2a        | 1:50       |
| CD14-PerCP Cy5.5                     | BD Pharmingen       | M5E2                     | IgG2a        | 1:25       |
| Lin-PE: CD3, CD19, CD20,<br>CD56     | Lab custom          | various                  | IgG1 & IgG2b | 1:20       |
| CD16-PE-Cy7                          | BD Pharmingen       | 3G8                      | IgG1         | 1:33       |
| CD11c-APC                            | BD Pharmingen       | S-HCL-3                  | IgG2b        | 1:33       |
| CD45-Pacific Blue                    | BioLegend           | HI30                     | IgG1         | 1:50       |
| CD3-APC-Alexa 750 or<br>Pacific Blue | eBioscience         | OKT3                     | IgG2a        | 1:33       |
| CD4-PE-Cy7                           | eBioscience         | RPA-T4                   | IgG1         | 1:33       |
| CD8-PerCP-Cy5.5                      | BD Pharmingen       | SK1                      | IgG1         | 1:20       |
| IL-17- Alexa 488                     | eBioscience         | eBio64DEC17              | rat IgG2a    | 1:20       |
| IFN $\gamma$ - Alexa 700             | BD Pharmingen       | B27                      | IgG1         | 1:33       |
| Live-Dead – aqua marina              | Invitrogen          | NA                       | NA           | 1:100      |
| CD40 - FITC                          | BD Pharmingen       | 5C3                      | IgG1         | 1:25       |
| CD86 – Pacific Blue                  | BioLegend           | IT2.2                    | IgG2b        | 1:50       |
| CD205/DEC-205 – Alexa 647            | BD Pharmingen       | MG38                     | IgG2b        | 1:33       |
| CD208/DC-LAMP – PE                   | BD Pharmingen       | 10-1112                  | IgG1         | 1:20       |
| CD209/DC-SIGN – PerCP-<br>Cy5.5      | BD Pharmingen       | DCN46                    | IgG2b        | 1:20       |

<sup>a</sup>All are murine monoclonals unless otherwise stated

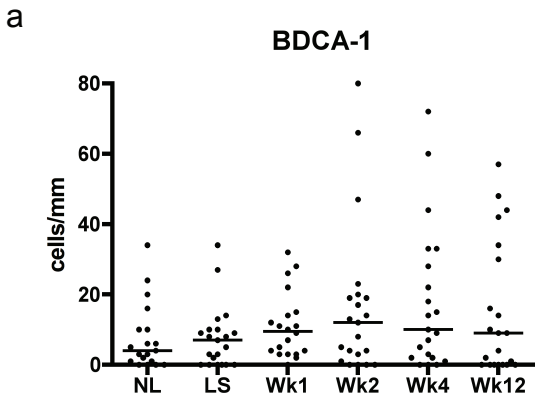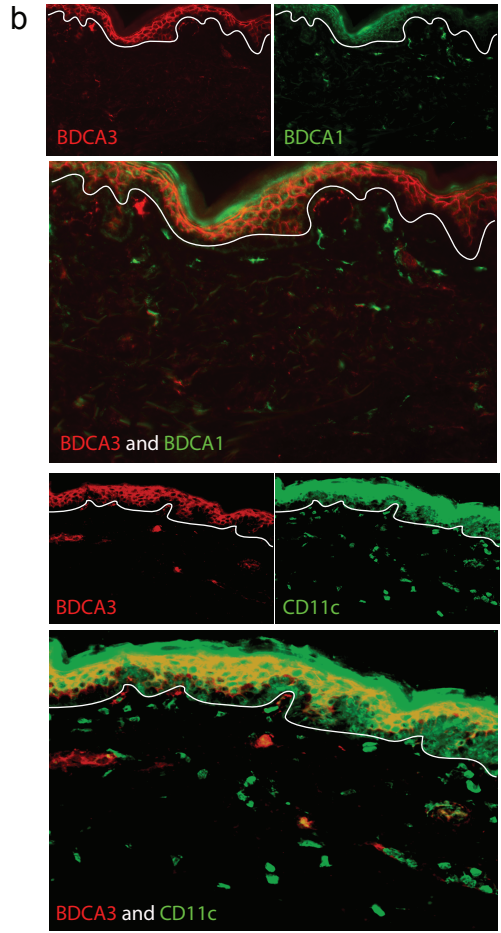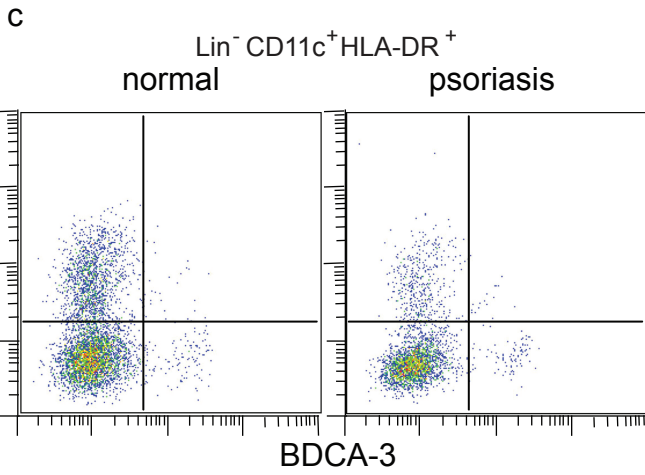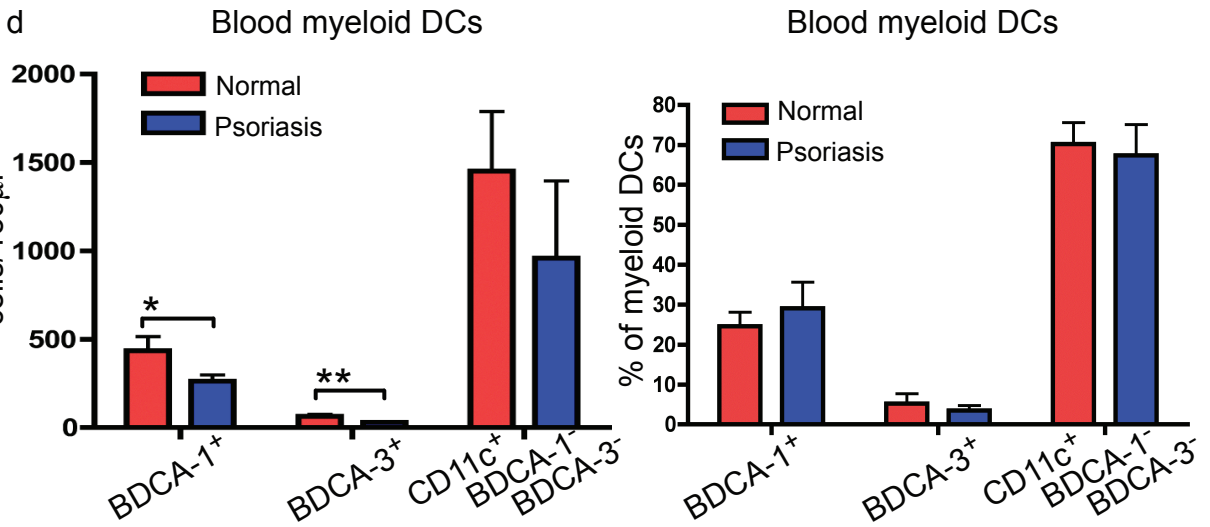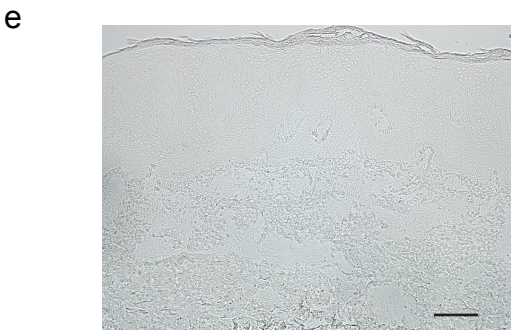

**Supplementary Figure 1. (a)** BDCA-1 cell counts during a clinical trial with etanercept, showing stable cell counts through out the treatment period. **(b) Upper panel.** BDCA-1 and BDCA-3 identified separate myeloid DC populations in the dermis of normal skin. **Lower panel.** In normal skin, BDCA-3<sup>+</sup> cells co-expressed CD11c (two positive cells), and some BDCA-3 staining was observed on blood vessels (n=4). In all IF figures, single stained controls are above the merged image, white line denotes dermo-epidermal junction, dermal collagen fibers gave green autofluorescence, and antibodies conjugated with a fluorochrome often gave background epidermal fluorescence. **(c)** Representative FACS plots comparing circulating BDCA-1<sup>+</sup> and BDCA-3<sup>+</sup> cells in normal and psoriatic circulation. Cells were gated on CD3<sup>-</sup>CD14<sup>-</sup>CD56<sup>-</sup>CD14<sup>-</sup>DR<sup>+</sup>11c<sup>+</sup>. **(d) Left panel.** FACS analysis of 150 $\mu$ L peripheral blood from normal volunteers (n=6) and psoriasis patients (n=6). Quantification of all patients showing a reduction in the circulation of BDCA-1<sup>+</sup> and BDCA-3<sup>+</sup> populations in psoriasis (blue) compared to normal patients (red). p<0.05 (\*), p<0.01 (\*\*). **Right panel.** quantification of data in (c) above; Y axis is % of myeloid DCs. **(e)** Negative control for immunohistochemistry of psoriasis lesional tissue, minus primary antibody. Size bar = 100 $\mu$ m.

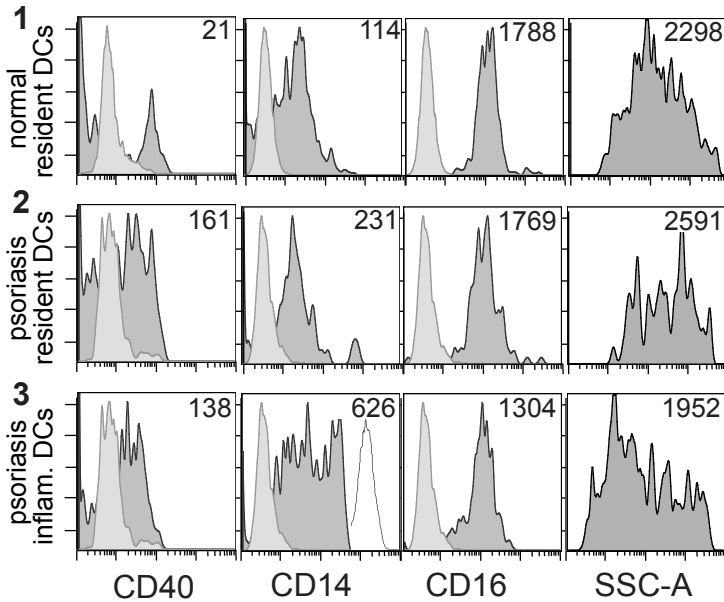

**Supplementary Figure 2.** Additional FACS analysis of myeloid DC populations from normal and psoriasis single cell suspensions. Flow cytometric analysis of single cell suspensions of dermal émigrés from normal dermis or psoriatic dermis (n=3 for each). Large cells gated on CD11c+ HLA-DR hi, histograms in each row were gated on boxes (1-3) as identified in Figure 6a. Dark grey histogram represents antigen expression, light grey is isotype, and no fill (row 3) is CD14 expression on blood monocytes. MFI is indicated in the upper right or upper left corner of each histogram. Resident BDCA-1+ myeloid DCs from normal and psoriatic dermis showed similar expression on CD40 and CD16, while the population of BDCA-1- DCs in psoriasis showed lower HLA-DR, wider range of expression of CD14, and were smaller cells.
